# Supplementary material for: Facile hydrothermal fabrication of ZnO–graphene hybrid anode materials with excellent lithium storage properties
Source: Royal Society of Chemistry journal article supplement (doi:10.1039/c7se00102a), 2017-01-01
Supplement: c7se00102a1.pdf [file c7se00102a1.pdf]

## Supplementary Information

### Facile Hydrothermal Fabrication of ZnO-graphene hybrid Anode Materials with Excellent Lithium Storage Properties

Yan Feng,<sup>\*ab</sup> Yuliang Zhang,<sup>a</sup> Xiangyun Song,<sup>b</sup> Yuzhen Wei,<sup>a</sup> and Vincent S. Battaglia<sup>b</sup>

<sup>a</sup> Key Laboratory of Inorganic-Organic Hybrid Functional Materials Chemistry, Ministry of Education; Tianjin Key Laboratory of Structure and Performance for Functional Molecules; College of Chemistry, Tianjin Normal University, Tianjin 300387, P. R. China. E-mail: hxxfyf@mail.tjnu.edu.cn

<sup>b</sup> Energy Storage and Distributed Resources Division, Energy Technologies Area, Lawrence Berkeley National Laboratory, Berkeley, California 94720, USA.

**Fig. S1** TGA of graphene oxide (GO) in oxygen at a rate of 10 °C min<sup>-1</sup>.

**Fig. S2** Cycle performances of the ZnO-LG (a) and ZnO-MG (b) anodes at a current density of 100 mA g<sup>-1</sup> with cut-off voltage of 0.01-1.0, 1.5, 2.0, 2.5, and 3.0 V.

**Fig. S3** (a) Cycle performances of the ZnO and ZnO-graphene anodes at a current density of 100 mA g<sup>-1</sup> with the specific capacity normalized over the specific surface area of the samples (from BET analysis data in Table 2); (b) High-rate performances of the ZnO-graphene anodes compared with the ZnO anode with specific capacity normalized over the specific surface area of the samples.

**Fig. S4** Cyclic voltammetry curves of the graphene anodes at a scan rate of 0.02 mV s<sup>-1</sup> for the first three cycles.

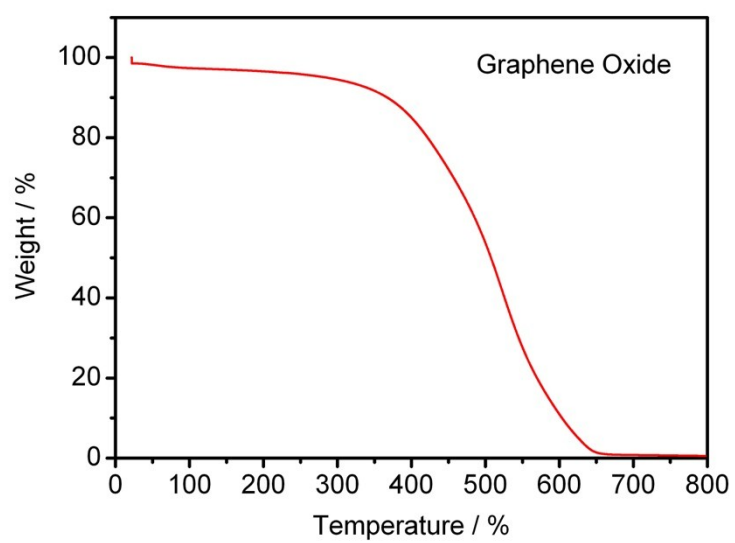

**Fig. S1** TGA of graphene oxide (GO) in oxygen at a rate of 10 °C min<sup>-1</sup>.

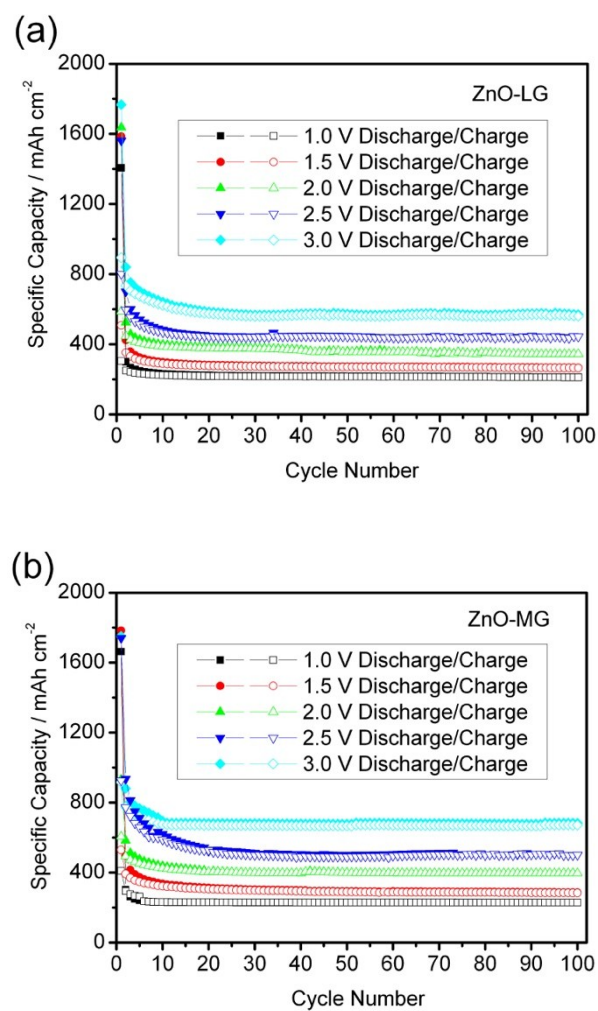

**Fig. S2** Cycle performance of the ZnO-LG (a) and ZnO-MG (b) anodes at a current density of 100 mA g<sup>-1</sup> with cut-off voltage of 0.01-1.0, 1.5, 2.0, 2.5, and 3.0 V.

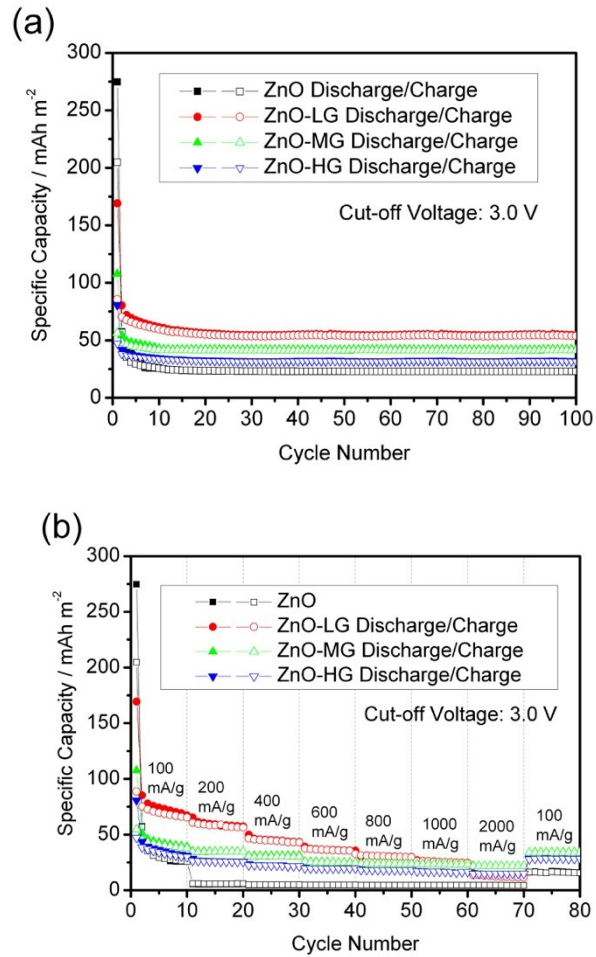

**Fig. S3** (a) Cycle performances of the ZnO and ZnO-graphene anodes at a current density of 100 mA g<sup>-1</sup> with the specific capacity normalized over the specific surface area of the samples (from BET analysis data in Table 2); (b) High-rate performances of the ZnO-graphene anodes compared with the ZnO anode with specific capacity normalized over the specific surface area of the samples.

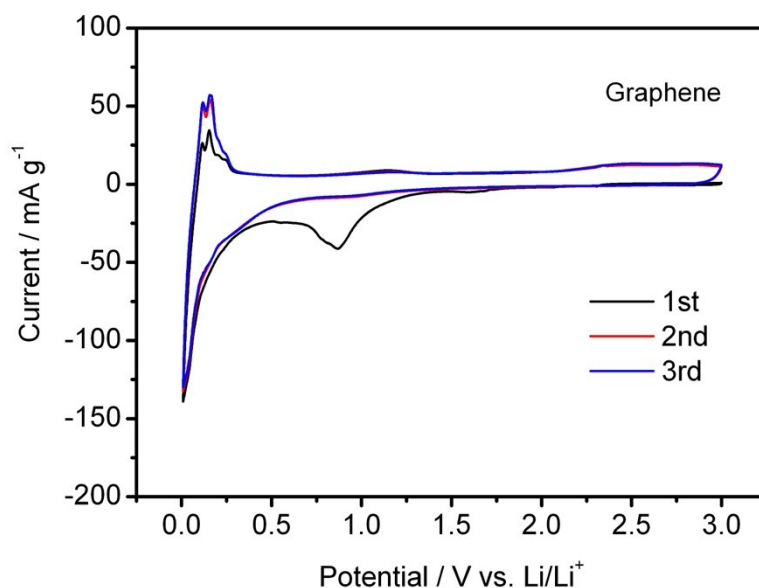

**Fig. S4** Cyclic voltammetry curves of the graphene anodes at a scan rate of  $0.02 \text{ mV s}^{-1}$  for the first three cycles.

The cathodic peak at about 0.8 V in the 1<sup>st</sup> cycle: the formation of a solid electrolyte interface (SEI) layer.

The anodic peaks at 0.11-0.16 V: the delithiation process of Li-C compounds.
